# Supplementary material
Source: publisher figshare collection journal article supplement (https://acs.figshare.com/ndownloader/files/8437499)
Supplement: Supplementary file 1 [file 8437499]

## Supporting Information

### Photoresponse of Natural van der Waals Heterostructures

Kyle Ray<sup>¶</sup>, Alexander E. Yore<sup>¶</sup>, Tong Mou<sup>†</sup>, Sauraj Jha<sup>¶</sup>, Kirby K.H. Smithe<sup>‡</sup>, Bin Wang<sup>†</sup>, Eric Pop<sup>‡</sup> and A. K. M. Newaz<sup>¶</sup>

<sup>¶</sup>Department of Physics and Astronomy, San Francisco State University, San Francisco, California 94132, United States,

<sup>†</sup>School of Chemical, Biological and Materials Engineering, University of Oklahoma, Norman, Oklahoma 73019, United States.

<sup>‡</sup>Department of Electrical Engineering, Stanford University, Stanford, California 94305, United States.

## Energy Dispersive Spectroscopy (EDXS) on the SEM of Franckeite

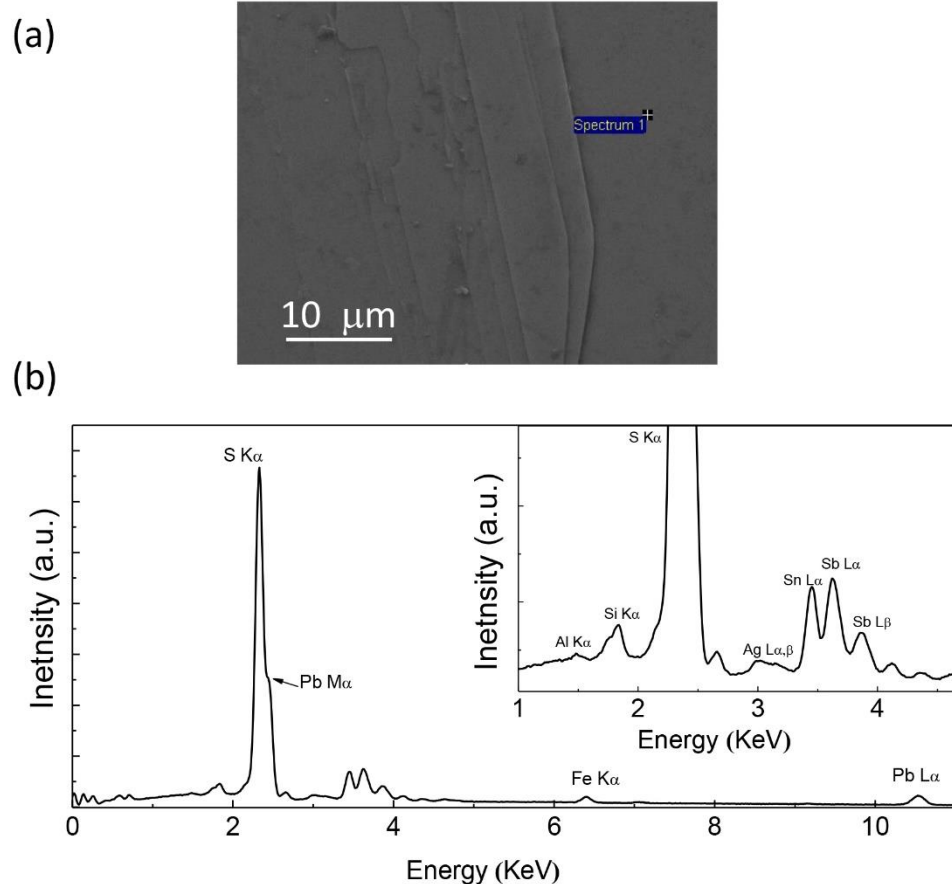

**Figure S1:** SEM and EDX characterization of franckeite. (a) SEM image of a franckeite flake used for the EDX study. (b) Average EDX spectra obtained for the sample.

| Element | Concentration (at %) |
|---------|----------------------|
| Al      | 0.61                 |
| S       | 57.49                |
| Fe      | 3.43                 |
| Sn      | 9.59                 |
| Sb      | 8.88                 |
| Pb      | 19.02                |
| Ag      | 0.98                 |
| Totals  | 100                  |

Table 1: EDXS quantification of franckeite crystal.

## Photoresponse of franckeite samples.

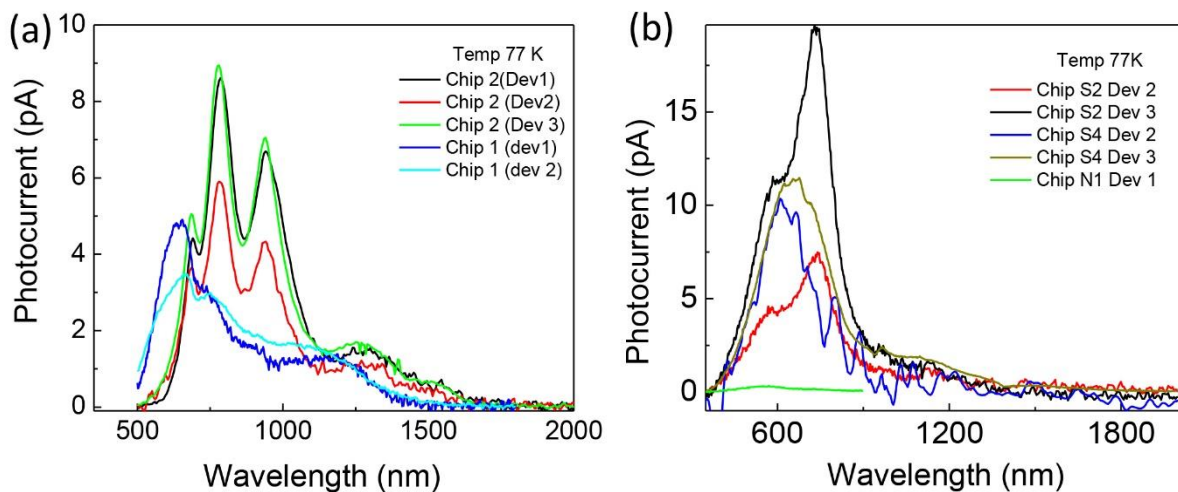

**Figure S2:** The PC response of 10 devices based on franckeite crystals. The measurement was conducted at 77K. Note that some peaks are due to the source spectrum.

## DFT Calculations

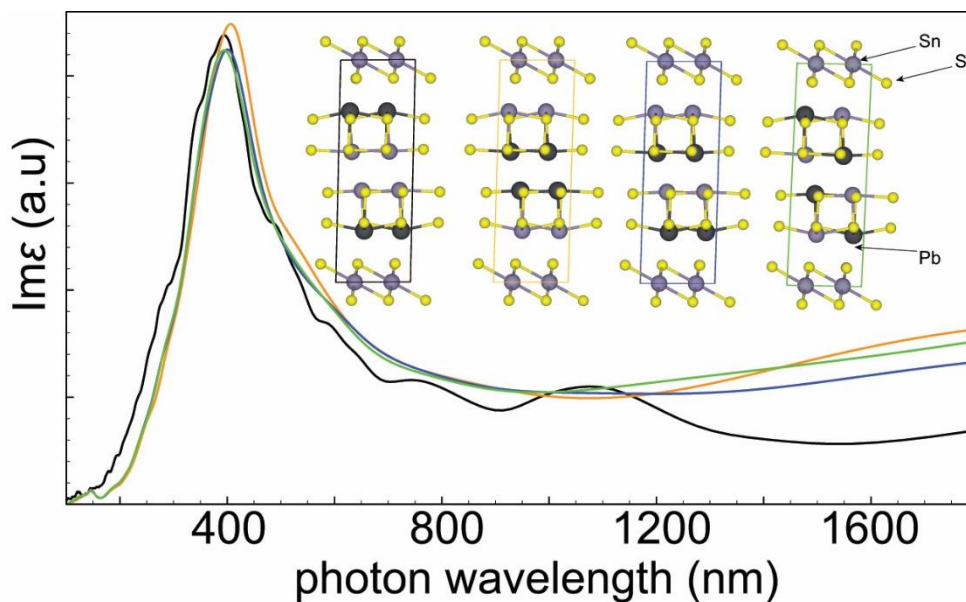

**Figure S3:** DFT-PBE calculated imaginary part of the dielectric function of the Franckeite bulk structure with varied stacking (insets) in the Q layer.

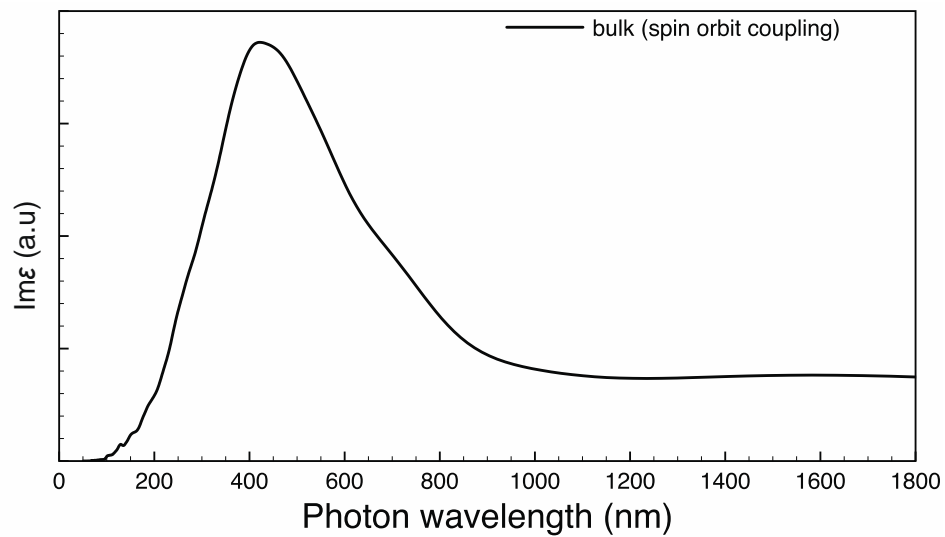

**Figure S4.** The imaginary part of the dielectric function for the francite bulk material with spin orbit coupling included.

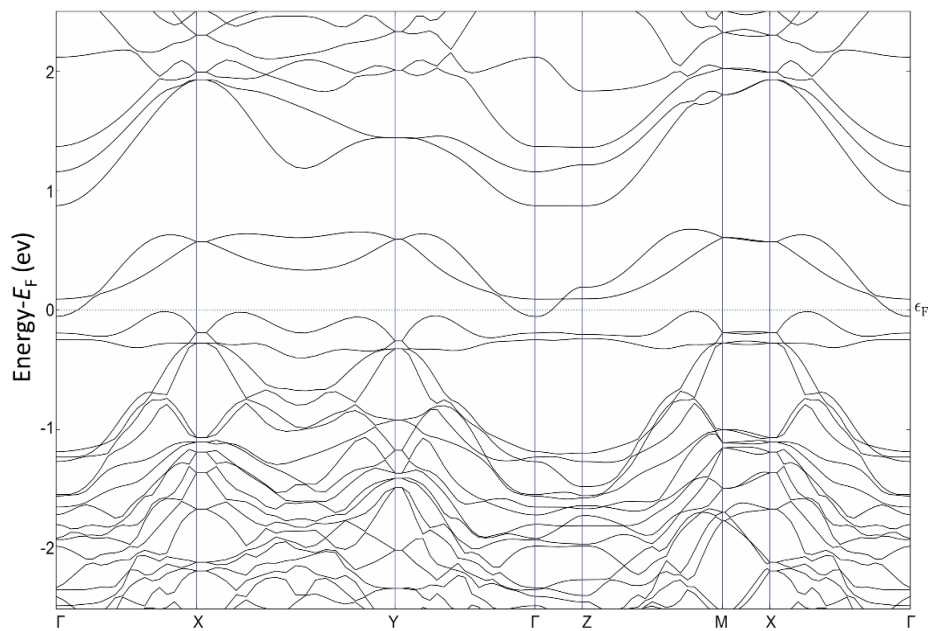

**Figure S5.** DFT calculated band structure of the bulk francite with spin-orbit coupling included

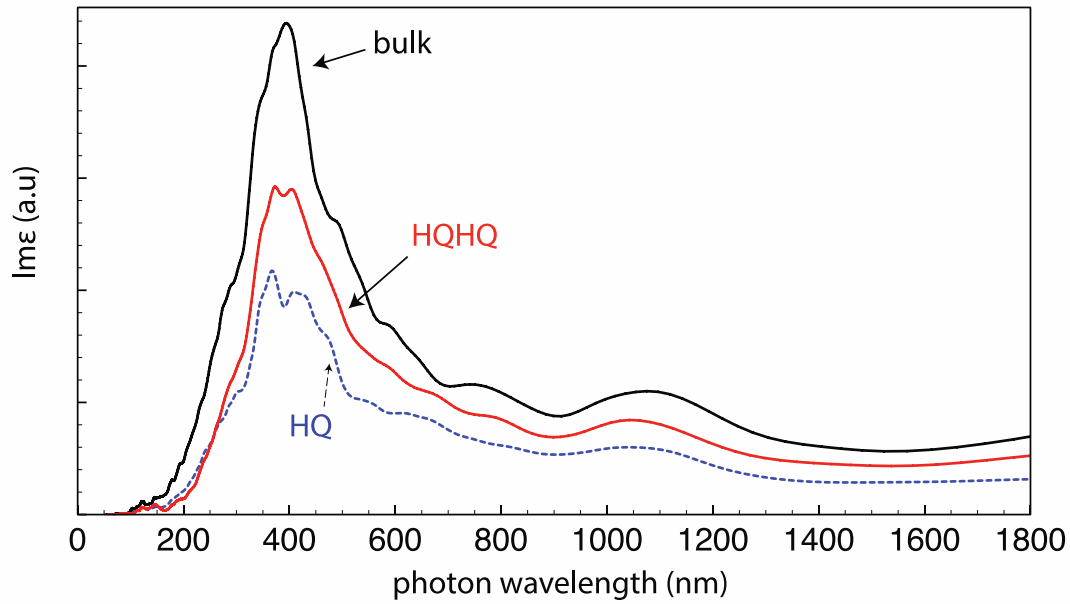

**Figure S6.** Calculation of the optical absorption properties of franckeite. The imaginary part of the dielectric function of HQHQ layer (red solid) and HQ layer (blue dashed) as compared with the bulk franckeite (solid black).

## Thickness measurement

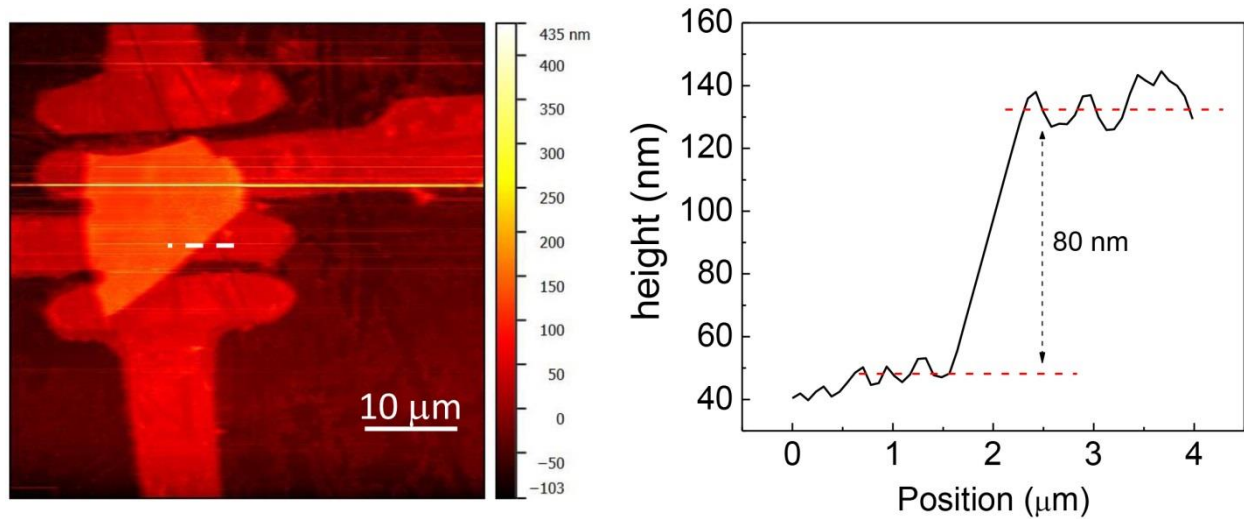

**Figure S7:** Thickness measurement by AFM. (Left) An AFM image of the flake on Au electrodes taken after the dry transfer. (b) The line profile of the sample along the white dashed line in the left figure.
